# Supplementary material for: Connections between prolactin and ovarian cancer
Source: PubMed Central journal article supplement (PMC8345882; doi:10.1371/journal.pone.0255701), 2021-08-06

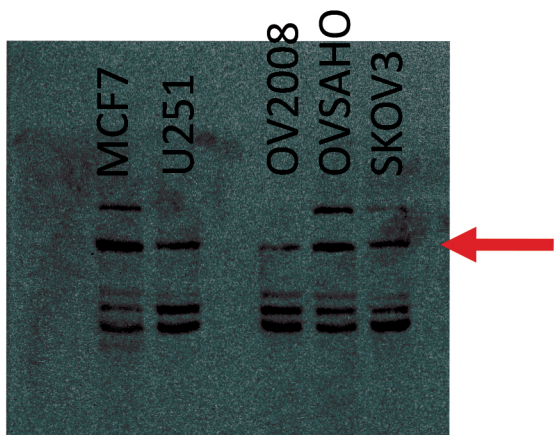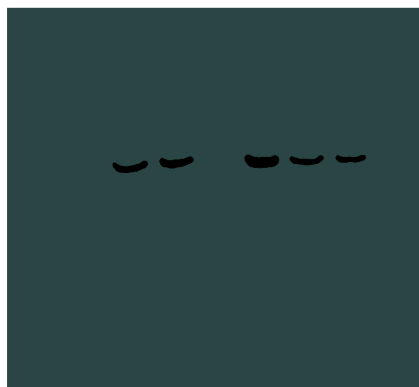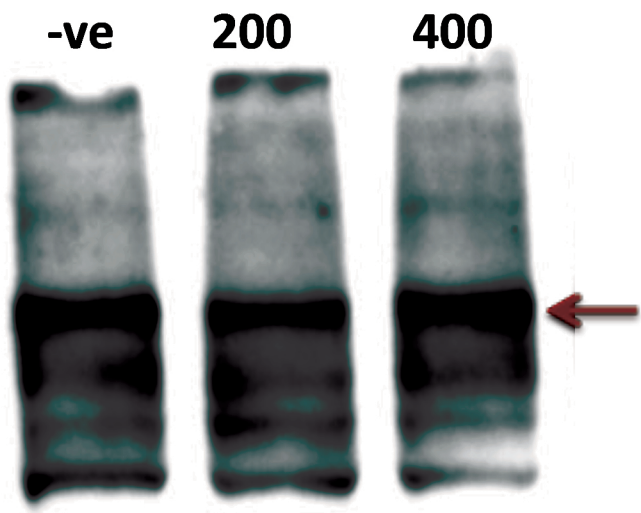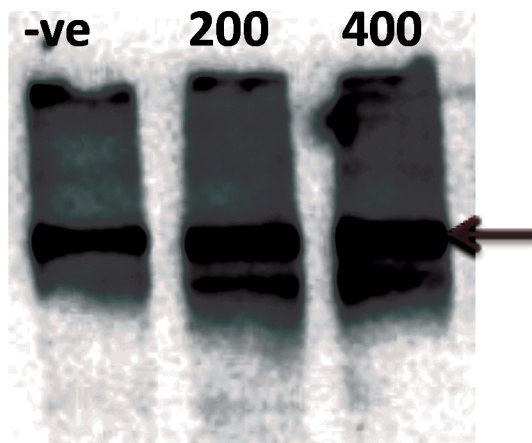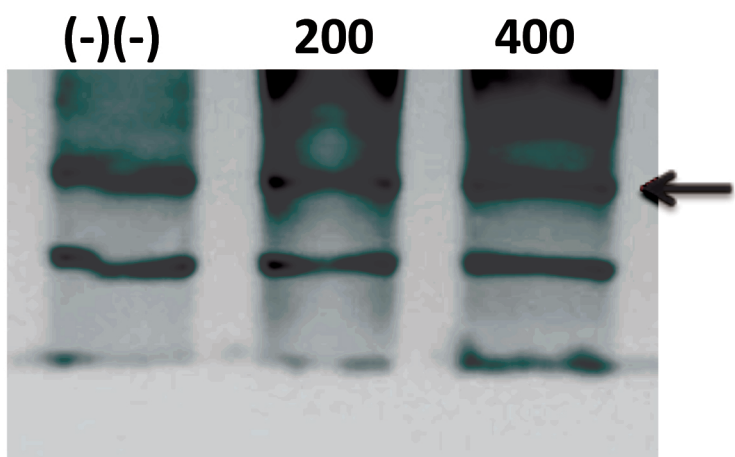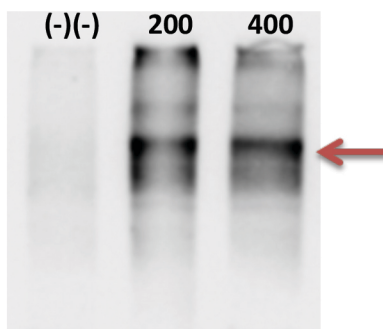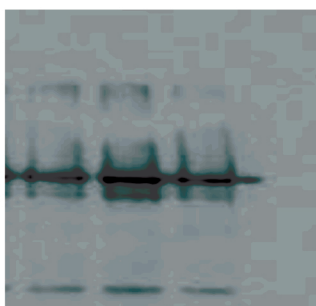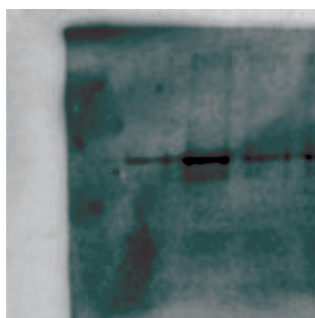

Supplement: pone.0255701.s001.pdf [file pone.0255701.s001.pdf]
